# Supplementary material
Source: Elsevier journal article supplement (https://www.sciencedirect.com/science/article/pii/S2529849621000551)
Supplement: mmc1 [file S2529849621000551:mmc1.docx]

**Appendix**

**Figure 1**Top row: T1- contrast-enhanced and T2-FLAIR sequences at the time of initial diagnosis

Second row: T1- contrast-enhanced and T2-FLAIR sequences 3 months post-op

**Figure 2**T2-FLAIR and T1-constrast enhanced sequences at the time of tumour recurrence

**Figure 3**LGG with astrocytic features (on the left HE 400X; in the middle GFAP 400X, on the right very low proliferative index (Ki-67) 200X)
